# Supplementary material
Source: publisher figshare collection journal article supplement (https://acs.figshare.com/ndownloader/files/4260355)
Supplement: Supplementary file 1 [file 4260355]

 
data_kl191 
  
_audit_creation_method            SHELXL-97 
_chemical_name_systematic 
; 
 ? 
; 
_chemical_name_common             ? 
_chemical_melting_point           ? 
_chemical_formula_moiety   '(C32 H50 O7 Si), 0.415(H2 O)' 
_chemical_formula_sum      'C32 H50.83 O7.415 Si' 
_chemical_formula_weight          582.29 
_chemical_absolute_configuration     ad
  
loop_ 
 _atom_type_symbol 
 _atom_type_description 
 _atom_type_scat_dispersion_real 
 _atom_type_scat_dispersion_imag 
 _atom_type_scat_source 
 'C'  'C'   0.0033   0.0016 
 'International Tables Vol C Tables 4.2.6.8 and 6.1.1.4' 
 'H'  'H'   0.0000   0.0000 
 'International Tables Vol C Tables 4.2.6.8 and 6.1.1.4' 
 'O'  'O'   0.0106   0.0060 
 'International Tables Vol C Tables 4.2.6.8 and 6.1.1.4' 
 'Si'  'Si'   0.0817   0.0704 
 'International Tables Vol C Tables 4.2.6.8 and 6.1.1.4' 
  
_symmetry_cell_setting            Monoclinic 
_symmetry_space_group_name_H-M    P2(1) 
  
loop_ 
 _symmetry_equiv_pos_as_xyz 
 'x, y, z' 
 '-x, y+1/2, -z' 
  
_cell_length_a                    8.6244(6) 
_cell_length_b                    16.3829(11) 
_cell_length_c                    12.3896(8) 
_cell_angle_alpha                 90.00 
_cell_angle_beta                  110.075(1) 
_cell_angle_gamma                 90.00 
_cell_volume                      1644.20(19) 
_cell_formula_units_Z             2 
_cell_measurement_temperature     100(2) 
_cell_measurement_reflns_used     5059 
_cell_measurement_theta_min       2.51 
_cell_measurement_theta_max       31.76 
  
_exptl_crystal_description        lathe 
_exptl_crystal_colour             colourless 
_exptl_crystal_size_max           0.32 
_exptl_crystal_size_mid           0.19 
_exptl_crystal_size_min           0.08 
_exptl_crystal_density_meas       ?
_exptl_crystal_density_diffrn     1.176 
_exptl_crystal_density_method     'not measured' 
_exptl_crystal_F_000              632 
_exptl_absorpt_coefficient_mu     0.116 
_exptl_absorpt_correction_type    multi-scan 
_exptl_absorpt_correction_T_min   0.9639 
_exptl_absorpt_correction_T_max   0.9908 
_exptl_absorpt_process_details    'Bruker SAINT (SADABS)'
  
_exptl_special_details 
; 
 ? 
; 
  
_diffrn_ambient_temperature       100(2) 
_diffrn_radiation_wavelength      0.71073 
_diffrn_radiation_type            MoK\a 
_diffrn_radiation_source          'fine-focus sealed tube' 
_diffrn_radiation_monochromator   graphite 
_diffrn_measurement_device_type   'Bruker APEX-II CCD' 
_diffrn_measurement_method        '\f and \w scans' 
_diffrn_detector_area_resol_mean  ? 
_diffrn_reflns_number             21344 
_diffrn_reflns_av_R_equivalents   0.0232 
_diffrn_reflns_av_sigmaI/netI     0.0393 
_diffrn_reflns_limit_h_min        -12 
_diffrn_reflns_limit_h_max        12 
_diffrn_reflns_limit_k_min        -24 
_diffrn_reflns_limit_k_max        24 
_diffrn_reflns_limit_l_min        -18 
_diffrn_reflns_limit_l_max        18 
_diffrn_reflns_theta_min          1.75 
_diffrn_reflns_theta_max          32.03 
_reflns_number_total              10801 
_reflns_number_gt                 9582 
_reflns_threshold_expression      >2sigma(I) 
  
_computing_data_collection        'Bruker APEX2' 
_computing_cell_refinement        'Bruker SAINT' 
_computing_data_reduction         'Bruker SAINT' 
_computing_structure_solution     'SHELXS-97 (Sheldrick, 2008)' 
_computing_structure_refinement   'SHELXL-97 (Sheldrick, 2008)' 
_computing_molecular_graphics     'Bruker SHELXTL' 
_computing_publication_material   'Bruker SHELXTL' 
  
_refine_special_details 
; 
 Refinement of F^2^ against ALL reflections.  The weighted R-factor wR and 
 goodness of fit S are based on F^2^, conventional R-factors R are based 
 on F, with F set to zero for negative F^2^. The threshold expression of 
 F^2^ > 2sigma(F^2^) is used only for calculating R-factors(gt) etc. and is 
 not relevant to the choice of reflections for refinement.  R-factors based 
 on F^2^ are statistically about twice as large as those based on F, and R- 
 factors based on ALL data will be even larger. 
; 
  
_refine_ls_structure_factor_coef  Fsqd 
_refine_ls_matrix_type            full 
_refine_ls_weighting_scheme       calc 
_refine_ls_weighting_details 
 'calc w=1/[\s^2^(Fo^2^)+(0.0850P)^2^+0.2100P] where P=(Fo^2^+2Fc^2^)/3' 
_atom_sites_solution_primary      direct 
_atom_sites_solution_secondary    difmap 
_atom_sites_solution_hydrogens    geom 
_refine_ls_hydrogen_treatment     mixed 
_refine_ls_extinction_method      none 
_refine_ls_extinction_coef        ? 
_refine_ls_abs_structure_details 
 'Flack H D (1983), Acta Cryst. A39, 876-881' 
_refine_ls_abs_structure_Flack    -0.03(10) 
_refine_ls_number_reflns          10801 
_refine_ls_number_parameters      400 
_refine_ls_number_restraints      203 
_refine_ls_R_factor_all           0.0638 
_refine_ls_R_factor_gt            0.0563 
_refine_ls_wR_factor_ref          0.1392 
_refine_ls_wR_factor_gt           0.1340 
_refine_ls_goodness_of_fit_ref    1.011 
_refine_ls_restrained_S_all       1.011 
_refine_ls_shift/su_max           0.000 
_refine_ls_shift/su_mean          0.000 
  
loop_ 
 _atom_site_label 
 _atom_site_type_symbol 
 _atom_site_fract_x 
 _atom_site_fract_y 
 _atom_site_fract_z 
 _atom_site_U_iso_or_equiv 
 _atom_site_adp_type 
 _atom_site_occupancy 
 _atom_site_symmetry_multiplicity 
 _atom_site_calc_flag 
 _atom_site_refinement_flags 
 _atom_site_disorder_assembly 
 _atom_site_disorder_group 
Si1 Si 0.53202(6) 0.00001(3) -0.42444(4) 0.02455(11) Uani 1 1 d D . . 
O1 O 0.14378(15) 0.22543(7) -0.37267(10) 0.0203(2) Uani 1 1 d . . . 
O2 O 0.20724(18) 0.34245(8) -0.44433(13) 0.0302(3) Uani 1 1 d . . . 
O3 O 0.18242(15) 0.26220(8) -0.13246(11) 0.0266(3) Uani 1 1 d . . . 
O4 O 0.4111(2) 0.39496(11) 0.04099(13) 0.0473(5) Uani 1 1 d . . . 
O5 O 0.64622(15) 0.26788(8) -0.07869(10) 0.0234(2) Uani 1 1 d . . . 
O6 O 0.55948(17) 0.18743(9) -0.30698(12) 0.0312(3) Uani 1 1 d . . . 
O7 O 0.37053(16) 0.05908(8) -0.43809(11) 0.0257(3) Uani 1 1 d . A . 
C1 C 0.1475(2) 0.30769(10) -0.38305(14) 0.0204(3) Uani 1 1 d . . . 
C2 C 0.0686(2) 0.34935(10) -0.30557(15) 0.0226(3) Uani 1 1 d . . . 
H2 H -0.0389 0.3216 -0.3160 0.027 Uiso 1 1 calc R . . 
C3 C 0.1781(2) 0.34211(10) -0.17776(15) 0.0234(3) Uani 1 1 d . . . 
H3 H 0.1347 0.3803 -0.1320 0.028 Uiso 1 1 calc R . . 
C4 C 0.3583(2) 0.36304(10) -0.15615(14) 0.0239(3) Uani 1 1 d . . . 
H4A H 0.4049 0.3244 -0.1984 0.029 Uiso 1 1 calc R . . 
H4B H 0.3666 0.4189 -0.1843 0.029 Uiso 1 1 calc R . . 
C5 C 0.4554(3) 0.35787(11) -0.02792(15) 0.0274(3) Uani 1 1 d . . . 
C6 C 0.6115(2) 0.30541(10) 0.01568(14) 0.0231(3) Uani 1 1 d . . . 
C7 C 0.64580(19) 0.17994(10) -0.06904(14) 0.0205(3) Uani 1 1 d . . . 
H7 H 0.7391 0.1574 -0.0905 0.025 Uiso 1 1 calc R . . 
C8 C 0.4851(2) 0.14276(10) -0.14792(14) 0.0208(3) Uani 1 1 d . . . 
H8A H 0.4825 0.0842 -0.1288 0.025 Uiso 1 1 calc R . . 
H8B H 0.3914 0.1699 -0.1336 0.025 Uiso 1 1 calc R . . 
C9 C 0.4626(2) 0.15059(10) -0.27400(14) 0.0211(3) Uani 1 1 d . A . 
C10 C 0.31297(19) 0.10784(10) -0.36519(14) 0.0190(3) Uani 1 1 d . . . 
C11 C 0.21148(19) 0.17625(10) -0.44420(13) 0.0188(3) Uani 1 1 d . A . 
H11 H 0.2868 0.2108 -0.4710 0.023 Uiso 1 1 calc R . . 
C12 C 0.0326(3) 0.43874(11) -0.34051(17) 0.0284(4) Uani 1 1 d . . . 
H12A H -0.0432 0.4417 -0.4201 0.043 Uiso 1 1 calc R . . 
H12B H 0.1359 0.4666 -0.3340 0.043 Uiso 1 1 calc R . . 
H12C H -0.0180 0.4652 -0.2898 0.043 Uiso 1 1 calc R . . 
C13 C 0.0339(3) 0.23409(17) -0.1175(2) 0.0418(5) Uani 1 1 d . . . 
H13A H -0.0348 0.2038 -0.1866 0.050 Uiso 1 1 calc R . . 
H13B H -0.0308 0.2809 -0.1053 0.050 Uiso 1 1 calc R . . 
C14 C 0.0837(2) 0.17916(13) -0.01450(18) 0.0312(4) Uani 1 1 d . . . 
C15 C 0.1625(3) 0.21132(17) 0.0932(2) 0.0426(5) Uani 1 1 d . . . 
H15 H 0.1798 0.2686 0.1009 0.051 Uiso 1 1 calc R . . 
C16 C 0.2172(3) 0.1632(2) 0.1901(2) 0.0545(7) Uani 1 1 d . . . 
H16 H 0.2739 0.1871 0.2629 0.065 Uiso 1 1 calc R . . 
C17 C 0.1898(4) 0.0820(2) 0.1811(3) 0.0563(7) Uani 1 1 d . . . 
H17 H 0.2262 0.0493 0.2485 0.068 Uiso 1 1 calc R . . 
C18 C 0.1106(3) 0.04554(15) 0.0768(3) 0.0523(7) Uani 1 1 d . . . 
H18 H 0.0920 -0.0117 0.0720 0.063 Uiso 1 1 calc R . . 
C19 C 0.0563(3) 0.09517(16) -0.0247(3) 0.0449(6) Uani 1 1 d . . . 
H19 H 0.0025 0.0712 -0.0978 0.054 Uiso 1 1 calc R . . 
C20 C 0.7581(3) 0.35931(14) 0.08100(18) 0.0368(4) Uani 1 1 d . . . 
H20A H 0.7807 0.3977 0.0275 0.055 Uiso 1 1 calc R . . 
H20B H 0.8555 0.3251 0.1166 0.055 Uiso 1 1 calc R . . 
H20C H 0.7323 0.3898 0.1408 0.055 Uiso 1 1 calc R . . 
C21 C 0.5856(2) 0.23468(11) 0.08881(14) 0.0221(3) Uani 1 1 d . . . 
H21A H 0.6302 0.2481 0.1717 0.026 Uiso 1 1 calc R . . 
H21B H 0.4672 0.2206 0.0673 0.026 Uiso 1 1 calc R . . 
C22 C 0.6826(2) 0.16531(11) 0.05963(14) 0.0232(3) Uani 1 1 d . . . 
H22 H 0.8028 0.1757 0.1006 0.028 Uiso 1 1 calc R . . 
C23 C 0.6420(3) 0.08057(12) 0.09363(17) 0.0332(4) Uani 1 1 d . . . 
H23A H 0.6964 0.0391 0.0620 0.050 Uiso 1 1 calc R . . 
H23B H 0.5223 0.0721 0.0631 0.050 Uiso 1 1 calc R . . 
H23C H 0.6813 0.0761 0.1776 0.050 Uiso 1 1 calc R . . 
C24 C 0.2101(2) 0.05545(11) -0.31364(15) 0.0241(3) Uani 1 1 d . A . 
H24A H 0.2802 0.0133 -0.2645 0.036 Uiso 1 1 calc R . . 
H24B H 0.1204 0.0295 -0.3755 0.036 Uiso 1 1 calc R . . 
H24C H 0.1635 0.0899 -0.2677 0.036 Uiso 1 1 calc R . . 
C25 C 0.0705(2) 0.14555(11) -0.54789(15) 0.0262(3) Uani 1 1 d . . . 
H25A H -0.0095 0.1159 -0.5210 0.031 Uiso 1 1 calc R A . 
H25B H 0.1146 0.1064 -0.5909 0.031 Uiso 1 1 calc R . . 
C26 C -0.0194(3) 0.21407(13) -0.62870(17) 0.0328(4) Uani 1 1 d . A . 
H26A H 0.0598 0.2449 -0.6536 0.049 Uiso 1 1 calc R . . 
H26B H -0.0712 0.2507 -0.5884 0.049 Uiso 1 1 calc R . . 
H26C H -0.1045 0.1906 -0.6960 0.049 Uiso 1 1 calc R . . 
C27A C 0.6972(6) 0.0002(4) -0.2800(3) 0.0364(8) Uani 0.415(3) 1 d PDU A 1 
H27A H 0.7516 0.0543 -0.2653 0.044 Uiso 0.415(3) 1 calc PR A 1 
H27B H 0.6475 -0.0099 -0.2200 0.044 Uiso 0.415(3) 1 calc PR A 1 
C28A C 0.8277(10) -0.0669(7) -0.2732(9) 0.0468(14) Uani 0.415(3) 1 d PDU A 1 
H28A H 0.9055 -0.0707 -0.1943 0.070 Uiso 0.415(3) 1 calc PR A 1 
H28B H 0.8879 -0.0527 -0.3249 0.070 Uiso 0.415(3) 1 calc PR A 1 
H28C H 0.7722 -0.1195 -0.2963 0.070 Uiso 0.415(3) 1 calc PR A 1 
C29A C 0.4480(12) -0.1058(4) -0.4630(6) 0.0415(11) Uani 0.415(3) 1 d PDU A 1 
H29A H 0.3522 -0.1031 -0.5354 0.050 Uiso 0.415(3) 1 calc PR A 1 
H29B H 0.5336 -0.1398 -0.4777 0.050 Uiso 0.415(3) 1 calc PR A 1 
C30A C 0.3937(9) -0.1481(4) -0.3706(7) 0.0555(11) Uani 0.415(3) 1 d PDU A 1 
H30A H 0.3511 -0.2027 -0.3973 0.083 Uiso 0.415(3) 1 calc PR A 1 
H30B H 0.3069 -0.1157 -0.3567 0.083 Uiso 0.415(3) 1 calc PR A 1 
H30C H 0.4884 -0.1527 -0.2992 0.083 Uiso 0.415(3) 1 calc PR A 1 
C31A C 0.6070(6) 0.0335(3) -0.5440(4) 0.0303(5) Uani 0.415(3) 1 d PDU A 1 
H31A H 0.7090 0.0031 -0.5376 0.036 Uiso 0.415(3) 1 calc PR A 1 
H31B H 0.5225 0.0193 -0.6188 0.036 Uiso 0.415(3) 1 calc PR A 1 
C32A C 0.6423(8) 0.1248(4) -0.5420(6) 0.0489(9) Uani 0.415(3) 1 d PDU A 1 
H32A H 0.6817 0.1385 -0.6051 0.073 Uiso 0.415(3) 1 calc PR A 1 
H32B H 0.7269 0.1393 -0.4686 0.073 Uiso 0.415(3) 1 calc PR A 1 
H32C H 0.5409 0.1553 -0.5510 0.073 Uiso 0.415(3) 1 calc PR A 1 
C27B C 0.6488(5) -0.0222(3) -0.2695(2) 0.0364(8) Uani 0.585(3) 1 d PDU A 2 
H27C H 0.6901 0.0298 -0.2290 0.044 Uiso 0.585(3) 1 calc PR A 2 
H27D H 0.5727 -0.0469 -0.2343 0.044 Uiso 0.585(3) 1 calc PR A 2 
C28B C 0.7963(7) -0.0804(4) -0.2524(6) 0.0468(14) Uani 0.585(3) 1 d PDU A 2 
H28D H 0.8544 -0.0889 -0.1700 0.070 Uiso 0.585(3) 1 calc PR A 2 
H28E H 0.8721 -0.0564 -0.2870 0.070 Uiso 0.585(3) 1 calc PR A 2 
H28F H 0.7558 -0.1329 -0.2892 0.070 Uiso 0.585(3) 1 calc PR A 2 
C29B C 0.4503(7) -0.0940(3) -0.5054(5) 0.0415(11) Uani 0.585(3) 1 d PDU A 2 
H29C H 0.3726 -0.0789 -0.5823 0.050 Uiso 0.585(3) 1 calc PR A 2 
H29D H 0.5428 -0.1244 -0.5166 0.050 Uiso 0.585(3) 1 calc PR A 2 
C30B C 0.3610(6) -0.1507(3) -0.4469(5) 0.0555(11) Uani 0.585(3) 1 d PDU A 2 
H30D H 0.3196 -0.1988 -0.4952 0.083 Uiso 0.585(3) 1 calc PR A 2 
H30E H 0.2682 -0.1215 -0.4362 0.083 Uiso 0.585(3) 1 calc PR A 2 
H30F H 0.4381 -0.1680 -0.3719 0.083 Uiso 0.585(3) 1 calc PR A 2 
C31B C 0.6796(4) 0.0551(2) -0.4806(3) 0.0303(5) Uani 0.585(3) 1 d PDU A 2 
H31C H 0.7367 0.0982 -0.4252 0.036 Uiso 0.585(3) 1 calc PR A 2 
H31D H 0.7643 0.0161 -0.4861 0.036 Uiso 0.585(3) 1 calc PR A 2 
C32B C 0.5955(6) 0.0936(3) -0.5974(4) 0.0489(9) Uani 0.585(3) 1 d PDU A 2 
H32D H 0.6780 0.1215 -0.6222 0.073 Uiso 0.585(3) 1 calc PR A 2 
H32E H 0.5130 0.1331 -0.5923 0.073 Uiso 0.585(3) 1 calc PR A 2 
H32F H 0.5412 0.0511 -0.6532 0.073 Uiso 0.585(3) 1 calc PR A 2 
O8W O 0.7099(5) 0.3673(3) -0.2384(3) 0.0419(10) Uani 0.415(3) 1 d PDU . . 
H81 H 0.694(9) 0.336(4) -0.190(4) 0.063 Uiso 0.415(3) 1 d PD . . 
H82 H 0.659(9) 0.350(4) -0.305(2) 0.063 Uiso 0.415(3) 1 d PD . . 
  
loop_ 
 _atom_site_aniso_label 
 _atom_site_aniso_U_11 
 _atom_site_aniso_U_22 
 _atom_site_aniso_U_33 
 _atom_site_aniso_U_23 
 _atom_site_aniso_U_13 
 _atom_site_aniso_U_12 
Si1 0.0268(2) 0.0199(2) 0.0319(2) 0.00190(19) 0.01637(19) 0.00426(17) 
O1 0.0237(5) 0.0167(5) 0.0242(5) 0.0009(4) 0.0129(4) 0.0018(4) 
O2 0.0399(7) 0.0216(6) 0.0377(7) 0.0005(5) 0.0241(6) -0.0017(5) 
O3 0.0268(6) 0.0243(6) 0.0346(6) 0.0118(5) 0.0181(5) 0.0084(5) 
O4 0.0711(12) 0.0405(9) 0.0271(7) -0.0005(6) 0.0129(7) 0.0309(8) 
O5 0.0262(6) 0.0224(6) 0.0224(5) -0.0014(5) 0.0093(5) -0.0007(5) 
O6 0.0286(7) 0.0383(8) 0.0277(6) -0.0019(6) 0.0111(5) -0.0091(5) 
O7 0.0259(6) 0.0267(6) 0.0241(6) -0.0050(5) 0.0079(5) 0.0081(5) 
C1 0.0210(7) 0.0187(7) 0.0222(7) 0.0002(6) 0.0084(6) 0.0020(5) 
C2 0.0241(7) 0.0197(7) 0.0267(8) 0.0014(6) 0.0123(6) 0.0066(6) 
C3 0.0293(8) 0.0194(7) 0.0253(7) 0.0042(6) 0.0139(6) 0.0096(6) 
C4 0.0322(9) 0.0177(7) 0.0215(7) 0.0010(6) 0.0086(6) 0.0025(6) 
C5 0.0399(10) 0.0177(7) 0.0228(7) 0.0011(6) 0.0086(7) 0.0050(7) 
C6 0.0284(8) 0.0195(7) 0.0203(7) -0.0016(6) 0.0071(6) -0.0012(6) 
C7 0.0181(7) 0.0216(7) 0.0203(6) -0.0007(6) 0.0045(5) 0.0034(5) 
C8 0.0203(7) 0.0228(7) 0.0199(7) -0.0017(6) 0.0075(6) 0.0022(6) 
C9 0.0198(7) 0.0213(7) 0.0217(7) -0.0007(6) 0.0064(6) 0.0035(6) 
C10 0.0196(7) 0.0176(7) 0.0199(7) -0.0017(5) 0.0070(6) 0.0021(5) 
C11 0.0214(7) 0.0162(6) 0.0206(6) -0.0003(5) 0.0094(5) 0.0023(5) 
C12 0.0349(9) 0.0213(8) 0.0286(8) 0.0055(7) 0.0104(7) 0.0119(7) 
C13 0.0278(9) 0.0495(13) 0.0538(13) 0.0241(11) 0.0212(9) 0.0070(9) 
C14 0.0269(8) 0.0326(9) 0.0427(10) 0.0132(8) 0.0229(8) 0.0075(7) 
C15 0.0346(11) 0.0513(13) 0.0494(12) 0.0052(10) 0.0240(10) 0.0025(9) 
C16 0.0439(13) 0.079(2) 0.0472(13) 0.0144(14) 0.0246(11) -0.0020(13) 
C17 0.0450(14) 0.0712(19) 0.0633(17) 0.0290(15) 0.0323(13) 0.0108(13) 
C18 0.0532(15) 0.0295(11) 0.095(2) 0.0150(12) 0.0515(16) 0.0077(10) 
C19 0.0412(12) 0.0396(12) 0.0671(16) -0.0001(11) 0.0353(12) -0.0008(9) 
C20 0.0439(11) 0.0308(10) 0.0313(9) -0.0064(8) 0.0074(8) -0.0139(8) 
C21 0.0257(8) 0.0226(7) 0.0171(6) 0.0006(6) 0.0062(6) 0.0038(6) 
C22 0.0228(7) 0.0235(8) 0.0207(7) -0.0001(6) 0.0040(6) 0.0046(6) 
C23 0.0459(11) 0.0223(8) 0.0275(9) 0.0051(7) 0.0074(8) 0.0059(7) 
C24 0.0269(8) 0.0203(7) 0.0246(7) 0.0013(6) 0.0082(6) -0.0030(6) 
C25 0.0261(8) 0.0248(8) 0.0230(7) -0.0018(6) 0.0026(6) 0.0001(6) 
C26 0.0329(9) 0.0326(10) 0.0258(8) 0.0018(7) 0.0009(7) 0.0019(7) 
C27A 0.0212(16) 0.041(2) 0.0445(14) -0.0001(13) 0.0082(12) 0.0108(13) 
C28A 0.036(2) 0.052(3) 0.053(3) 0.0056(18) 0.0147(16) 0.023(2) 
C29A 0.0352(12) 0.0320(17) 0.059(3) -0.019(2) 0.019(2) 0.0031(12) 
C30A 0.0448(19) 0.0314(14) 0.087(3) 0.000(2) 0.019(2) -0.0058(13) 
C31A 0.0319(13) 0.0357(13) 0.0270(11) 0.0034(11) 0.0149(10) 0.0020(10) 
C32A 0.0441(19) 0.066(2) 0.0400(18) 0.0150(16) 0.0188(16) -0.0053(16) 
C27B 0.0212(16) 0.041(2) 0.0445(14) -0.0001(13) 0.0082(12) 0.0108(13) 
C28B 0.036(2) 0.052(3) 0.053(3) 0.0056(18) 0.0147(16) 0.023(2) 
C29B 0.0352(12) 0.0320(17) 0.059(3) -0.019(2) 0.019(2) 0.0031(12) 
C30B 0.0448(19) 0.0314(14) 0.087(3) 0.000(2) 0.019(2) -0.0058(13) 
C31B 0.0319(13) 0.0357(13) 0.0270(11) 0.0034(11) 0.0149(10) 0.0020(10) 
C32B 0.0441(19) 0.066(2) 0.0400(18) 0.0150(16) 0.0188(16) -0.0053(16) 
O8W 0.048(2) 0.044(2) 0.0387(19) 0.0084(17) 0.0213(18) -0.0054(17) 
  
_geom_special_details 
; 
 All esds (except the esd in the dihedral angle between two l.s. planes) 
 are estimated using the full covariance matrix.  The cell esds are taken 
 into account individually in the estimation of esds in distances, angles 
 and torsion angles; correlations between esds in cell parameters are only 
 used when they are defined by crystal symmetry.  An approximate (isotropic) 
 treatment of cell esds is used for estimating esds involving l.s. planes. 
; 
  
loop_ 
 _geom_bond_atom_site_label_1 
 _geom_bond_atom_site_label_2 
 _geom_bond_distance 
 _geom_bond_site_symmetry_2 
 _geom_bond_publ_flag 
Si1 O7 1.6563(13) . ? 
Si1 C29B 1.841(5) . ? 
Si1 C27A 1.866(3) . ? 
Si1 C27B 1.872(3) . ? 
Si1 C29A 1.876(6) . ? 
Si1 C31B 1.878(3) . ? 
Si1 C31A 1.890(4) . ? 
O1 C1 1.355(2) . ? 
O1 C11 1.4596(18) . ? 
O2 C1 1.198(2) . ? 
O3 C3 1.420(2) . ? 
O3 C13 1.431(2) . ? 
O4 C5 1.212(2) . ? 
O5 C6 1.441(2) . ? 
O5 C7 1.446(2) . ? 
O6 C9 1.210(2) . ? 
O7 C10 1.4170(19) . ? 
C1 C2 1.517(2) . ? 
C2 C12 1.528(2) . ? 
C2 C3 1.545(2) . ? 
C2 H2 1.0000 . ? 
C3 C4 1.523(3) . ? 
C3 H3 1.0000 . ? 
C4 C5 1.523(2) . ? 
C4 H4A 0.9900 . ? 
C4 H4B 0.9900 . ? 
C5 C6 1.531(3) . ? 
C6 C20 1.527(3) . ? 
C6 C21 1.534(2) . ? 
C7 C8 1.522(2) . ? 
C7 C22 1.534(2) . ? 
C7 H7 1.0000 . ? 
C8 C9 1.512(2) . ? 
C8 H8A 0.9900 . ? 
C8 H8B 0.9900 . ? 
C9 C10 1.559(2) . ? 
C10 C24 1.523(2) . ? 
C10 C11 1.547(2) . ? 
C11 C25 1.520(2) . ? 
C11 H11 1.0000 . ? 
C12 H12A 0.9800 . ? 
C12 H12B 0.9800 . ? 
C12 H12C 0.9800 . ? 
C13 C14 1.499(3) . ? 
C13 H13A 0.9900 . ? 
C13 H13B 0.9900 . ? 
C14 C15 1.378(3) . ? 
C14 C19 1.394(3) . ? 
C15 C16 1.377(4) . ? 
C15 H15 0.9500 . ? 
C16 C17 1.349(5) . ? 
C16 H16 0.9500 . ? 
C17 C18 1.374(5) . ? 
C17 H17 0.9500 . ? 
C18 C19 1.435(4) . ? 
C18 H18 0.9500 . ? 
C19 H19 0.9500 . ? 
C20 H20A 0.9800 . ? 
C20 H20B 0.9800 . ? 
C20 H20C 0.9800 . ? 
C21 C22 1.526(2) . ? 
C21 H21A 0.9900 . ? 
C21 H21B 0.9900 . ? 
C22 C23 1.526(3) . ? 
C22 H22 1.0000 . ? 
C23 H23A 0.9800 . ? 
C23 H23B 0.9800 . ? 
C23 H23C 0.9800 . ? 
C24 H24A 0.9800 . ? 
C24 H24B 0.9800 . ? 
C24 H24C 0.9800 . ? 
C25 C26 1.527(3) . ? 
C25 H25A 0.9900 . ? 
C25 H25B 0.9900 . ? 
C26 H26A 0.9800 . ? 
C26 H26B 0.9800 . ? 
C26 H26C 0.9800 . ? 
C27A C28A 1.554(7) . ? 
C27A H27A 0.9900 . ? 
C27A H27B 0.9900 . ? 
C28A H28A 0.9800 . ? 
C28A H28B 0.9800 . ? 
C28A H28C 0.9800 . ? 
C29A C30A 1.543(7) . ? 
C29A H29A 0.9900 . ? 
C29A H29B 0.9900 . ? 
C30A H30A 0.9800 . ? 
C30A H30B 0.9800 . ? 
C30A H30C 0.9800 . ? 
C31A C32A 1.525(7) . ? 
C31A H31A 0.9900 . ? 
C31A H31B 0.9900 . ? 
C32A H32A 0.9800 . ? 
C32A H32B 0.9800 . ? 
C32A H32C 0.9800 . ? 
C27B C28B 1.545(5) . ? 
C27B H27C 0.9900 . ? 
C27B H27D 0.9900 . ? 
C28B H28D 0.9800 . ? 
C28B H28E 0.9800 . ? 
C28B H28F 0.9800 . ? 
C29B C30B 1.538(6) . ? 
C29B H29C 0.9900 . ? 
C29B H29D 0.9900 . ? 
C30B H30D 0.9800 . ? 
C30B H30E 0.9800 . ? 
C30B H30F 0.9800 . ? 
C31B C32B 1.516(5) . ? 
C31B H31C 0.9900 . ? 
C31B H31D 0.9900 . ? 
C32B H32D 0.9800 . ? 
C32B H32E 0.9800 . ? 
C32B H32F 0.9800 . ? 
O8W H81 0.840(10) . ? 
O8W H82 0.843(10) . ? 
  
loop_ 
 _geom_angle_atom_site_label_1 
 _geom_angle_atom_site_label_2 
 _geom_angle_atom_site_label_3 
 _geom_angle 
 _geom_angle_site_symmetry_1 
 _geom_angle_site_symmetry_3 
 _geom_angle_publ_flag 
O7 Si1 C27A 115.81(19) . . ? 
O7 Si1 C29A 106.0(3) . . ? 
O7 Si1 C31A 104.62(16) . . ? 
O7 Si1 C27B 110.84(13) . . ? 
O7 Si1 C29B 106.4(2) . . ? 
O7 Si1 C31B 109.56(12) . . ? 
C27A Si1 C29A 110.3(3) . . ? 
C27A Si1 C31A 113.4(3) . . ? 
C29A Si1 C31A 105.9(3) . . ? 
C27B Si1 C29B 111.5(2) . . ? 
C27B Si1 C31B 106.17(18) . . ? 
C29B Si1 C31B 112.44(19) . . ? 
C1 O1 C11 117.63(12) . . ? 
C3 O3 C13 116.38(15) . . ? 
C6 O5 C7 110.55(12) . . ? 
C10 O7 Si1 136.94(11) . . ? 
O2 C1 O1 124.23(15) . . ? 
O2 C1 C2 124.86(15) . . ? 
O1 C1 C2 110.91(14) . . ? 
C1 C2 C12 110.09(14) . . ? 
C1 C2 C3 111.39(13) . . ? 
C12 C2 C3 110.92(15) . . ? 
C1 C2 H2 108.1 . . ? 
C12 C2 H2 108.1 . . ? 
C3 C2 H2 108.1 . . ? 
O3 C3 C4 104.56(13) . . ? 
O3 C3 C2 113.56(15) . . ? 
C4 C3 C2 113.01(14) . . ? 
O3 C3 H3 108.5 . . ? 
C4 C3 H3 108.5 . . ? 
C2 C3 H3 108.5 . . ? 
C5 C4 C3 109.47(15) . . ? 
C5 C4 H4A 109.8 . . ? 
C3 C4 H4A 109.8 . . ? 
C5 C4 H4B 109.8 . . ? 
C3 C4 H4B 109.8 . . ? 
H4A C4 H4B 108.2 . . ? 
O4 C5 C4 120.91(17) . . ? 
O4 C5 C6 119.00(16) . . ? 
C4 C5 C6 120.09(15) . . ? 
O5 C6 C20 108.16(15) . . ? 
O5 C6 C5 110.85(14) . . ? 
C20 C6 C5 109.29(15) . . ? 
O5 C6 C21 105.66(13) . . ? 
C20 C6 C21 112.68(15) . . ? 
C5 C6 C21 110.14(14) . . ? 
O5 C7 C8 111.91(13) . . ? 
O5 C7 C22 103.66(13) . . ? 
C8 C7 C22 115.02(14) . . ? 
O5 C7 H7 108.7 . . ? 
C8 C7 H7 108.7 . . ? 
C22 C7 H7 108.7 . . ? 
C9 C8 C7 113.26(14) . . ? 
C9 C8 H8A 108.9 . . ? 
C7 C8 H8A 108.9 . . ? 
C9 C8 H8B 108.9 . . ? 
C7 C8 H8B 108.9 . . ? 
H8A C8 H8B 107.7 . . ? 
O6 C9 C8 122.19(15) . . ? 
O6 C9 C10 118.36(15) . . ? 
C8 C9 C10 119.42(14) . . ? 
O7 C10 C24 109.36(14) . . ? 
O7 C10 C11 104.54(12) . . ? 
C24 C10 C11 112.89(13) . . ? 
O7 C10 C9 109.34(13) . . ? 
C24 C10 C9 113.92(13) . . ? 
C11 C10 C9 106.31(13) . . ? 
O1 C11 C25 108.97(13) . . ? 
O1 C11 C10 105.85(12) . . ? 
C25 C11 C10 114.20(13) . . ? 
O1 C11 H11 109.2 . . ? 
C25 C11 H11 109.2 . . ? 
C10 C11 H11 109.2 . . ? 
C2 C12 H12A 109.5 . . ? 
C2 C12 H12B 109.5 . . ? 
H12A C12 H12B 109.5 . . ? 
C2 C12 H12C 109.5 . . ? 
H12A C12 H12C 109.5 . . ? 
H12B C12 H12C 109.5 . . ? 
O3 C13 C14 107.21(17) . . ? 
O3 C13 H13A 110.3 . . ? 
C14 C13 H13A 110.3 . . ? 
O3 C13 H13B 110.3 . . ? 
C14 C13 H13B 110.3 . . ? 
H13A C13 H13B 108.5 . . ? 
C15 C14 C19 118.5(2) . . ? 
C15 C14 C13 119.8(2) . . ? 
C19 C14 C13 121.7(2) . . ? 
C16 C15 C14 122.2(3) . . ? 
C16 C15 H15 118.9 . . ? 
C14 C15 H15 118.9 . . ? 
C17 C16 C15 119.6(3) . . ? 
C17 C16 H16 120.2 . . ? 
C15 C16 H16 120.2 . . ? 
C16 C17 C18 121.6(3) . . ? 
C16 C17 H17 119.2 . . ? 
C18 C17 H17 119.2 . . ? 
C17 C18 C19 119.0(2) . . ? 
C17 C18 H18 120.5 . . ? 
C19 C18 H18 120.5 . . ? 
C14 C19 C18 119.1(3) . . ? 
C14 C19 H19 120.5 . . ? 
C18 C19 H19 120.5 . . ? 
C6 C20 H20A 109.5 . . ? 
C6 C20 H20B 109.5 . . ? 
H20A C20 H20B 109.5 . . ? 
C6 C20 H20C 109.5 . . ? 
H20A C20 H20C 109.5 . . ? 
H20B C20 H20C 109.5 . . ? 
C22 C21 C6 102.71(13) . . ? 
C22 C21 H21A 111.2 . . ? 
C6 C21 H21A 111.2 . . ? 
C22 C21 H21B 111.2 . . ? 
C6 C21 H21B 111.2 . . ? 
H21A C21 H21B 109.1 . . ? 
C23 C22 C21 114.56(16) . . ? 
C23 C22 C7 116.35(15) . . ? 
C21 C22 C7 101.25(13) . . ? 
C23 C22 H22 108.1 . . ? 
C21 C22 H22 108.1 . . ? 
C7 C22 H22 108.1 . . ? 
C22 C23 H23A 109.5 . . ? 
C22 C23 H23B 109.5 . . ? 
H23A C23 H23B 109.5 . . ? 
C22 C23 H23C 109.5 . . ? 
H23A C23 H23C 109.5 . . ? 
H23B C23 H23C 109.5 . . ? 
C10 C24 H24A 109.5 . . ? 
C10 C24 H24B 109.5 . . ? 
H24A C24 H24B 109.5 . . ? 
C10 C24 H24C 109.5 . . ? 
H24A C24 H24C 109.5 . . ? 
H24B C24 H24C 109.5 . . ? 
C11 C25 C26 112.95(15) . . ? 
C11 C25 H25A 109.0 . . ? 
C26 C25 H25A 109.0 . . ? 
C11 C25 H25B 109.0 . . ? 
C26 C25 H25B 109.0 . . ? 
H25A C25 H25B 107.8 . . ? 
C25 C26 H26A 109.5 . . ? 
C25 C26 H26B 109.5 . . ? 
H26A C26 H26B 109.5 . . ? 
C25 C26 H26C 109.5 . . ? 
H26A C26 H26C 109.5 . . ? 
H26B C26 H26C 109.5 . . ? 
C28A C27A Si1 110.5(5) . . ? 
C28A C27A H27A 109.5 . . ? 
Si1 C27A H27A 109.5 . . ? 
C28A C27A H27B 109.5 . . ? 
Si1 C27A H27B 109.5 . . ? 
H27A C27A H27B 108.1 . . ? 
C27A C28A H28A 109.5 . . ? 
C27A C28A H28B 109.5 . . ? 
H28A C28A H28B 109.5 . . ? 
C27A C28A H28C 109.5 . . ? 
H28A C28A H28C 109.5 . . ? 
H28B C28A H28C 109.5 . . ? 
C30A C29A Si1 114.5(4) . . ? 
C30A C29A H29A 108.6 . . ? 
Si1 C29A H29A 108.6 . . ? 
C30A C29A H29B 108.6 . . ? 
Si1 C29A H29B 108.6 . . ? 
H29A C29A H29B 107.6 . . ? 
C29A C30A H30A 109.5 . . ? 
C29A C30A H30B 109.5 . . ? 
H30A C30A H30B 109.5 . . ? 
C29A C30A H30C 109.5 . . ? 
H30A C30A H30C 109.5 . . ? 
H30B C30A H30C 109.5 . . ? 
C32A C31A Si1 113.1(4) . . ? 
C32A C31A H31A 109.0 . . ? 
Si1 C31A H31A 109.0 . . ? 
C32A C31A H31B 109.0 . . ? 
Si1 C31A H31B 109.0 . . ? 
H31A C31A H31B 107.8 . . ? 
C31A C32A H32A 109.5 . . ? 
C31A C32A H32B 109.5 . . ? 
H32A C32A H32B 109.5 . . ? 
C31A C32A H32C 109.5 . . ? 
H32A C32A H32C 109.5 . . ? 
H32B C32A H32C 109.5 . . ? 
C28B C27B Si1 112.9(3) . . ? 
C28B C27B H27C 109.0 . . ? 
Si1 C27B H27C 109.0 . . ? 
C28B C27B H27D 109.0 . . ? 
Si1 C27B H27D 109.0 . . ? 
H27C C27B H27D 107.8 . . ? 
C27B C28B H28D 109.5 . . ? 
C27B C28B H28E 109.5 . . ? 
H28D C28B H28E 109.5 . . ? 
C27B C28B H28F 109.5 . . ? 
H28D C28B H28F 109.5 . . ? 
H28E C28B H28F 109.5 . . ? 
C30B C29B Si1 114.1(3) . . ? 
C30B C29B H29C 108.7 . . ? 
Si1 C29B H29C 108.7 . . ? 
C30B C29B H29D 108.7 . . ? 
Si1 C29B H29D 108.7 . . ? 
H29C C29B H29D 107.6 . . ? 
C29B C30B H30D 109.5 . . ? 
C29B C30B H30E 109.5 . . ? 
H30D C30B H30E 109.5 . . ? 
C29B C30B H30F 109.5 . . ? 
H30D C30B H30F 109.5 . . ? 
H30E C30B H30F 109.5 . . ? 
C32B C31B Si1 113.0(3) . . ? 
C32B C31B H31C 109.0 . . ? 
Si1 C31B H31C 109.0 . . ? 
C32B C31B H31D 109.0 . . ? 
Si1 C31B H31D 109.0 . . ? 
H31C C31B H31D 107.8 . . ? 
C31B C32B H32D 109.5 . . ? 
C31B C32B H32E 109.5 . . ? 
H32D C32B H32E 109.5 . . ? 
C31B C32B H32F 109.5 . . ? 
H32D C32B H32F 109.5 . . ? 
H32E C32B H32F 109.5 . . ? 
H81 O8W H82 110.1(18) . . ? 
  
loop_ 
 _geom_torsion_atom_site_label_1 
 _geom_torsion_atom_site_label_2 
 _geom_torsion_atom_site_label_3 
 _geom_torsion_atom_site_label_4 
 _geom_torsion 
 _geom_torsion_site_symmetry_1 
 _geom_torsion_site_symmetry_2 
 _geom_torsion_site_symmetry_3 
 _geom_torsion_site_symmetry_4 
 _geom_torsion_publ_flag 
C29B Si1 O7 C10 134.6(2) . . . . ? 
C27A Si1 O7 C10 -6.2(3) . . . . ? 
C27B Si1 O7 C10 13.3(2) . . . . ? 
C29A Si1 O7 C10 116.5(3) . . . . ? 
C31B Si1 O7 C10 -103.6(2) . . . . ? 
C31A Si1 O7 C10 -131.8(2) . . . . ? 
C11 O1 C1 O2 -2.4(2) . . . . ? 
C11 O1 C1 C2 178.44(13) . . . . ? 
O2 C1 C2 C12 15.7(2) . . . . ? 
O1 C1 C2 C12 -165.14(15) . . . . ? 
O2 C1 C2 C3 -107.8(2) . . . . ? 
O1 C1 C2 C3 71.39(18) . . . . ? 
C13 O3 C3 C4 166.30(17) . . . . ? 
C13 O3 C3 C2 -70.1(2) . . . . ? 
C1 C2 C3 O3 -71.76(18) . . . . ? 
C12 C2 C3 O3 165.24(14) . . . . ? 
C1 C2 C3 C4 47.13(19) . . . . ? 
C12 C2 C3 C4 -75.87(17) . . . . ? 
O3 C3 C4 C5 -58.42(17) . . . . ? 
C2 C3 C4 C5 177.59(14) . . . . ? 
C3 C4 C5 O4 -53.2(2) . . . . ? 
C3 C4 C5 C6 126.84(17) . . . . ? 
C7 O5 C6 C20 120.24(15) . . . . ? 
C7 O5 C6 C5 -119.96(14) . . . . ? 
C7 O5 C6 C21 -0.65(17) . . . . ? 
O4 C5 C6 O5 -178.62(19) . . . . ? 
C4 C5 C6 O5 1.3(2) . . . . ? 
O4 C5 C6 C20 -59.5(2) . . . . ? 
C4 C5 C6 C20 120.46(18) . . . . ? 
O4 C5 C6 C21 64.8(2) . . . . ? 
C4 C5 C6 C21 -115.24(18) . . . . ? 
C6 O5 C7 C8 100.85(15) . . . . ? 
C6 O5 C7 C22 -23.68(16) . . . . ? 
O5 C7 C8 C9 68.37(17) . . . . ? 
C22 C7 C8 C9 -173.69(14) . . . . ? 
C7 C8 C9 O6 -4.3(2) . . . . ? 
C7 C8 C9 C10 173.83(13) . . . . ? 
Si1 O7 C10 C24 -87.89(19) . . . . ? 
Si1 O7 C10 C11 150.97(15) . . . . ? 
Si1 O7 C10 C9 37.5(2) . . . . ? 
O6 C9 C10 O7 50.8(2) . . . . ? 
C8 C9 C10 O7 -127.40(15) . . . . ? 
O6 C9 C10 C24 173.47(16) . . . . ? 
C8 C9 C10 C24 -4.7(2) . . . . ? 
O6 C9 C10 C11 -61.56(19) . . . . ? 
C8 C9 C10 C11 120.27(15) . . . . ? 
C1 O1 C11 C25 -99.37(16) . . . . ? 
C1 O1 C11 C10 137.38(14) . . . . ? 
O7 C10 C11 O1 177.37(12) . . . . ? 
C24 C10 C11 O1 58.60(16) . . . . ? 
C9 C10 C11 O1 -67.01(15) . . . . ? 
O7 C10 C11 C25 57.49(17) . . . . ? 
C24 C10 C11 C25 -61.28(18) . . . . ? 
C9 C10 C11 C25 173.11(14) . . . . ? 
C3 O3 C13 C14 -147.23(18) . . . . ? 
O3 C13 C14 C15 67.9(3) . . . . ? 
O3 C13 C14 C19 -110.3(2) . . . . ? 
C19 C14 C15 C16 1.1(3) . . . . ? 
C13 C14 C15 C16 -177.2(2) . . . . ? 
C14 C15 C16 C17 -1.7(4) . . . . ? 
C15 C16 C17 C18 1.1(4) . . . . ? 
C16 C17 C18 C19 0.2(4) . . . . ? 
C15 C14 C19 C18 0.2(3) . . . . ? 
C13 C14 C19 C18 178.41(19) . . . . ? 
C17 C18 C19 C14 -0.8(3) . . . . ? 
O5 C6 C21 C22 24.74(17) . . . . ? 
C20 C6 C21 C22 -93.16(18) . . . . ? 
C5 C6 C21 C22 144.52(14) . . . . ? 
C6 C21 C22 C23 -163.95(15) . . . . ? 
C6 C21 C22 C7 -37.91(16) . . . . ? 
O5 C7 C22 C23 162.82(15) . . . . ? 
C8 C7 C22 C23 40.3(2) . . . . ? 
O5 C7 C22 C21 37.97(16) . . . . ? 
C8 C7 C22 C21 -84.52(17) . . . . ? 
O1 C11 C25 C26 66.07(19) . . . . ? 
C10 C11 C25 C26 -175.82(15) . . . . ? 
O7 Si1 C27A C28A 171.5(5) . . . . ? 
C29A Si1 C27A C28A 51.1(6) . . . . ? 
C31A Si1 C27A C28A -67.5(6) . . . . ? 
O7 Si1 C29A C30A -74.4(6) . . . . ? 
C27A Si1 C29A C30A 51.7(7) . . . . ? 
C31A Si1 C29A C30A 174.8(6) . . . . ? 
O7 Si1 C31A C32A 54.7(4) . . . . ? 
C27A Si1 C31A C32A -72.4(5) . . . . ? 
C29A Si1 C31A C32A 166.5(5) . . . . ? 
O7 Si1 C27B C28B 177.3(3) . . . . ? 
C29B Si1 C27B C28B 59.0(4) . . . . ? 
C31B Si1 C27B C28B -63.8(4) . . . . ? 
O7 Si1 C29B C30B -73.1(4) . . . . ? 
C27B Si1 C29B C30B 47.8(5) . . . . ? 
C31B Si1 C29B C30B 166.9(4) . . . . ? 
O7 Si1 C31B C32B -47.9(3) . . . . ? 
C29B Si1 C31B C32B 70.2(4) . . . . ? 
C27B Si1 C31B C32B -167.7(3) . . . . ? 
  
loop_ 
 _geom_hbond_atom_site_label_D 
 _geom_hbond_atom_site_label_H 
 _geom_hbond_atom_site_label_A 
 _geom_hbond_distance_DH 
 _geom_hbond_distance_HA 
 _geom_hbond_distance_DA 
 _geom_hbond_angle_DHA 
 _geom_hbond_site_symmetry_A 
O8W H81 O5  0.840(10) 1.921(12) 2.760(4) 176(8) . 
O8W H82 O6  0.843(10) 2.80(6) 3.214(5) 112(5) . 
  
_diffrn_measured_fraction_theta_max    0.994 
_diffrn_reflns_theta_full              32.03 
_diffrn_measured_fraction_theta_full   0.994 
_refine_diff_density_max    0.565 
_refine_diff_density_min   -0.257 
_refine_diff_density_rms    0.064 
